# Supplementary material for: Identification and Application of a Novel Immune-Related lncRNA Signature on the Prognosis and Immunotherapy for Lung Adenocarcinoma
Source: MDPI journal article supplement (doi:10.3390/diagnostics12112891), 2022-11-21
Supplement: s1 [file s1]

## Descriptions of supplement

**Table S1.** Clinicopathological characteristics of LUAD patients in TCGA, GEO datasets and clinical cohort.

|                | TCGA dataset        |                    |                   | GEO dataset         | Clinical cohort |
|----------------|---------------------|--------------------|-------------------|---------------------|-----------------|
|                | Training<br>(N=360) | Testing<br>(N=153) | Entire<br>(N=513) | GSE120622<br>(N=44) | (N=30)          |
| Gender         |                     |                    |                   |                     |                 |
| Male           | 167 (46.4%)         | 70 (45.8%)         | 237 (46.2%)       | 24 (54.5%)          | 18 (60.0%)      |
| Female         | 193 (53.6%)         | 83 (54.2%)         | 276 (53.8%)       | 20 (45.5%)          | 12 (40.0%)      |
| Age<br>(years) |                     |                    |                   |                     |                 |
| >60            | 244 (67.8%)         | 96 (62.7%)         | 340 (66.3%)       | 30 (68.2%)          | 22 (73.3%)      |
| ≤60            | 111 (30.8%)         | 52 (34.0%)         | 163 (31.8%)       | 14 (31.8%)          | 8 (26.7%)       |
| Unknown        | 5 (1.4%)            | 5 (3.3%)           | 10 (1.9%)         | NA                  | NA              |
| TNM stage      |                     |                    |                   |                     |                 |
| Stage I        | 199 (55.3%)         | 81 (52.9%)         | 280 (54.6%)       | 18 (40.9%)          | 8 (26.7%)       |
| Stage II       | 83 (23.1%)          | 37 (24.2%)         | 120 (23.4%)       | 8 (18.2%)           | 2 (6.7%)        |
| Stage III      | 56 (15.6%)          | 24 (15.7%)         | 80 (15.6%)        | 17 (38.6%)          | 3 (10.0%)       |
| Stage IV       | 18 (5.0%)           | 7 (4.6%)           | 25 (4.9%)         | 1 (2.3%)            | 17 (56.7%)      |
| Unknown        | 4 (1.1%)            | 4 (2.6%)           | 8 (1.6%)          | NA                  | NA              |
| T stage        |                     |                    |                   |                     |                 |
| T1             | 120 (33.3%)         | 51 (33.3%)         | 171 (33.3%)       | 4 (9.1%)            | 5 (16.7%)       |
| T2             | 191 (53.1%)         | 84 (54.9%)         | 275 (53.6%)       | 31 (70.5%)          | 8 (26.7%)       |
| T3             | 31 (8.6%)           | 15 (9.8%)          | 46 (9.0%)         | 6 (13.6%)           | 5 (16.7%)       |
| T4             | 15 (4.2%)           | 3 (2.0%)           | 18 (3.5%)         | 2 (4.5%)            | 12 (40.0%)      |
| Unknown        | 3 (0.8%)            | NA                 | 3 (0.6%)          | 1 (2.3%)            | NA              |
| M stage        |                     |                    |                   |                     |                 |
| M0             | 240 (66.7%)         | 102 (66.7%)        | 342 (66.7%)       | 42 (95.5%)          | 13 (43.3%)      |
| M1             | 17 (4.7%)           | 7 (4.6%)           | 24 (4.7%)         | 1 (2.3%)            | 17 (56.7%)      |
| MX             | 101 (28.1%)         | 41 (26.8%)         | 142 (27.7%)       | NA                  | NA              |
| Unknown        | 2 (0.6%)            | 3 (2.0%)           | 5 (1.0%)          | 1 (2.3%)            | NA              |
| N stage        |                     |                    |                   |                     |                 |
| N0             | 240 (66.7%)         | 95 (62.1%)         | 335 (65.3%)       | 23 (52.3%)          | 11 (36.7%)      |
| N1             | 62 (17.2%)          | 32 (20.9%)         | 94 (18.3%)        | 10 (22.7%)          | NA              |
| N2             | 47 (13.1%)          | 22 (14.4%)         | 69 (13.5%)        | 11 (25.0%)          | 13 (43.3%)      |
| N3             | 1 (0.3%)            | 1 (0.7%)           | 2 (0.4%)          | NA                  | 6 (20.0%)       |
| NX             | 9 (2.5%)            | 3 (2.0%)           | 12 (2.3%)         | NA                  | NA              |
| Unknown        | 1 (0.3%)            | NA                 | 1 (0.2%)          | NA                  | NA              |

Note: N means Number; NA means Not available.

**Table S2.** Baseline clinical characteristics of LUAD patients with low and high risk in TCGA, GEO datasets and clinical cohort.

|                 | Low risk (N) | High risk (N) | p value |
|-----------------|--------------|---------------|---------|
| TCGA dataset    |              |               |         |
| Gender          |              |               | 0.1467  |
| Male            | 111          | 126           |         |
| Female          | 147          | 129           |         |
| Age (years)     |              |               | 0.0761  |
| >60             | 181          | 159           |         |
| ≤60             | 73           | 90            |         |
| Unknown         | 4            | 6             |         |
| GSE 120622      |              |               |         |
| Gender          |              |               | 0.2259  |
| Male            | 14           | 10            |         |
| Female          | 8            | 12            |         |
| Age (years)     |              |               | >0.9999 |
| >60             | 15           | 15            |         |
| ≤60             | 7            | 7             |         |
| Clinical cohort |              |               |         |
| Gender          |              |               | 0.7104  |
| Male            | 8            | 10            |         |
| Female          | 7            | 5             |         |
| Age (years)     |              |               | 0.2148  |
| >60             | 13           | 9             |         |
| ≤60             | 2            | 6             |         |

Note: N means Number.

**Table S3.** Primer sequence of lncRNAs.

| Primer name | Primer sequence                                      | Length |
|-------------|------------------------------------------------------|--------|
| AC104971.3  | TCTTGGCACCTAACAGTTTGTGAA<br>GTTCTCAGTCCTCTGGGATTTCT  | 70bp   |
| FAM215A     | CACCGTTTGGGATGGTTGATT<br>GCTCCTTATTTAACGCACTGTTG     | 139bp  |
| AC021678.2  | GGACTAACCCAGGAAGATGCTAC<br>CCAGCTGATACCCTTGGACTCT    | 81bp   |
| LINC02413   | CGTAGCAACTGATTGGATTTCTG<br>TCTTAGCGTAACATCCATCATGC   | 122bp  |
| AL161781.2  | GTAGACTCTTTGGACAGTATGGGA<br>A CTCAAAACAAACAACCACCACA | 178bp  |
| LY86-AS1    | AAGGCATACTGAGTTGCGGG<br>TCTGTTCGGTTCAAGAAAGGG        | 74bp   |
| GADPH       | ACCCAGAAGACTGTGGATGG<br>TTCTAGACGGCAGGTCAGGT         | 20bp   |

## Supplementary figures with legends

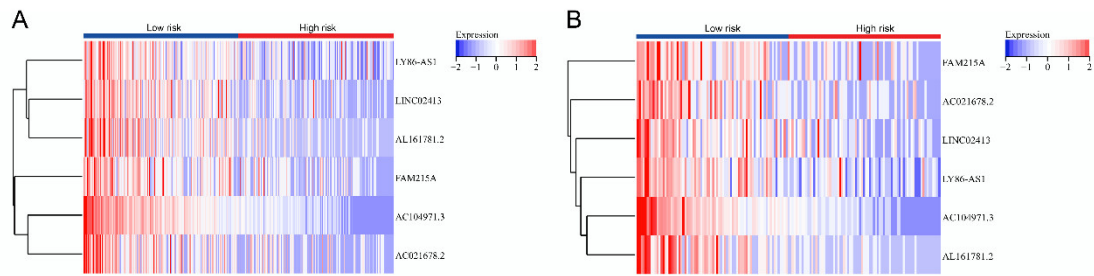

**Figure S1. Expression profiles of the prognostic immune signature.** Heatmap of expression in the six prognostic IRLs from (A) training and (B) testing TCGA datasets.

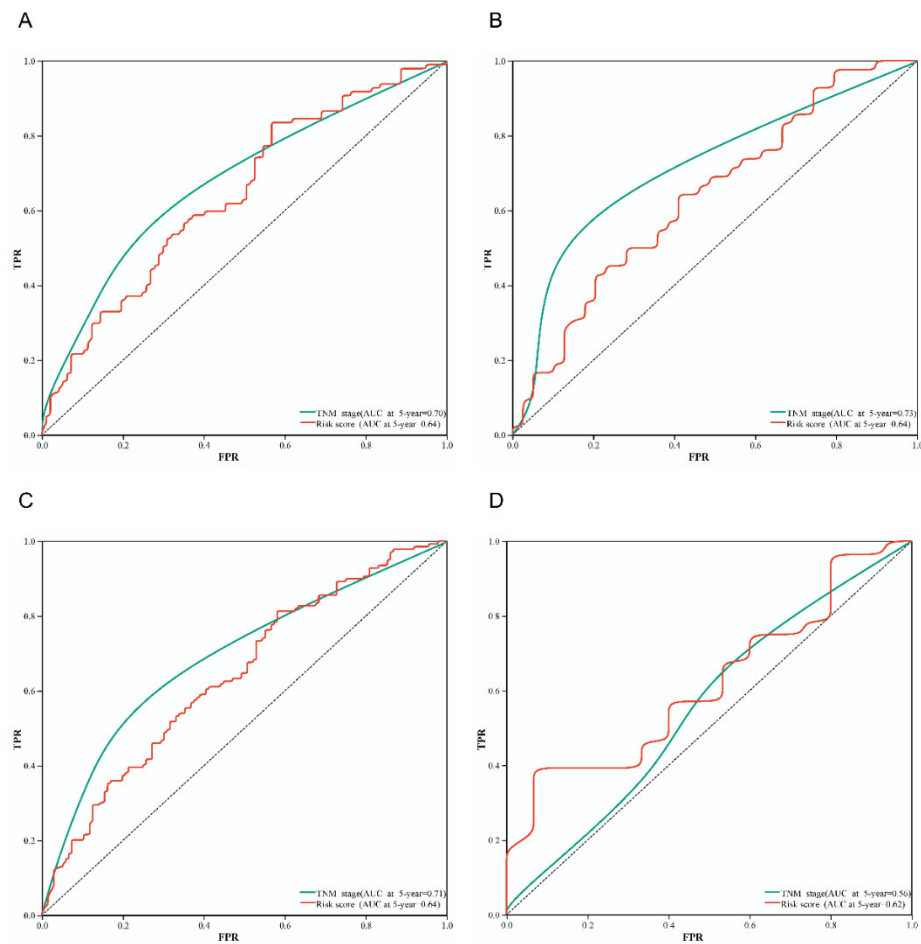

**Figure S2. ROC curves of risk score with IRLs.** ROC curves for predicting 5-year overall survival in patients of the (A) TCGA training dataset, (B) TCGA testing dataset (C) TCGA entire dataset, and (D) GSE120622. AUC, areas under the ROC curve. FPR, false positive rate. TPR, true positive rate.

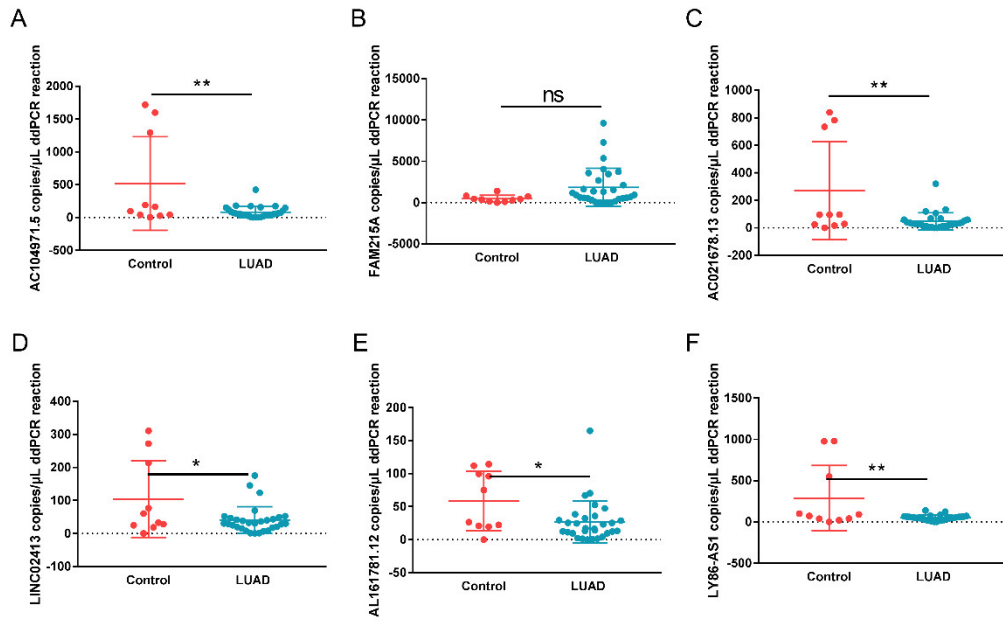

**Figure S3. Absolute quantification of six IRLs in a case-control study.** (A–F) Expression profiles of AC104971.5, FAM215A, AC021678.13, LINC02413, AL161781.12, and LY86-AS1 in lung tissue from 30 patients with LUAD and 10 negative controls. \*\*p < 0.01, \*p < 0.05.

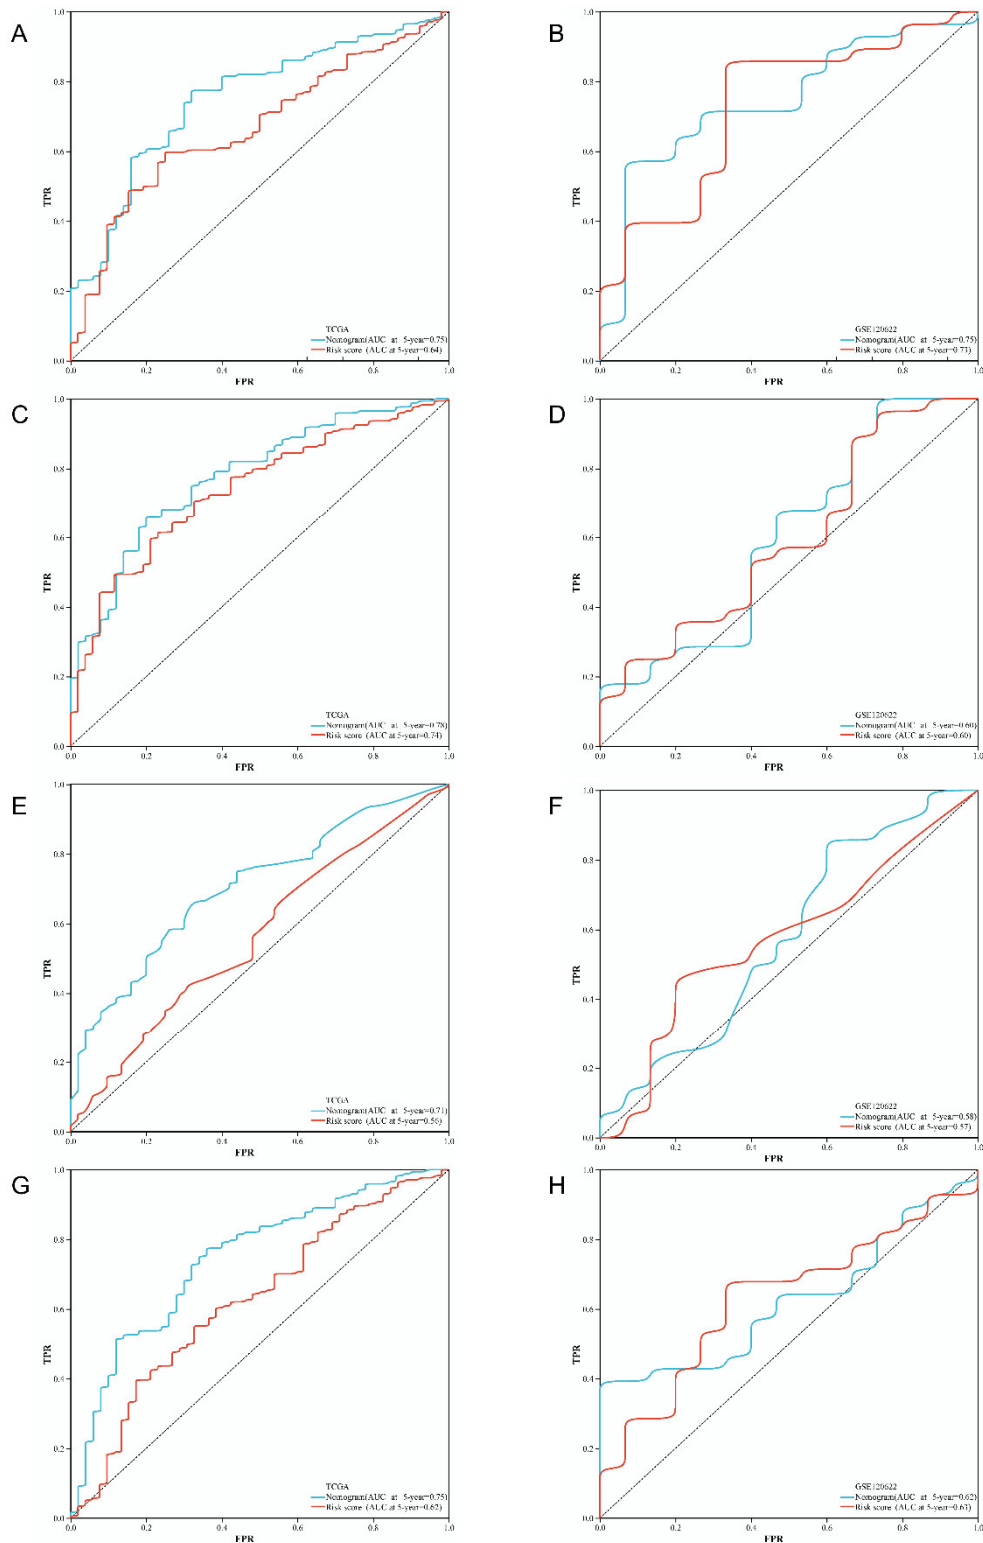

**Figure S4. Comparison with other reported IRL risk score models and relevant nomograms.** AUC values of the ROC curves of (A, B) 4-IRL signature, (C, D) 33 IRL pairs signature, (E, F) 8 IRL pairs signature, and (G, H) 6-IRL signature in TCGA–LUAD entire dataset and GSE120622.

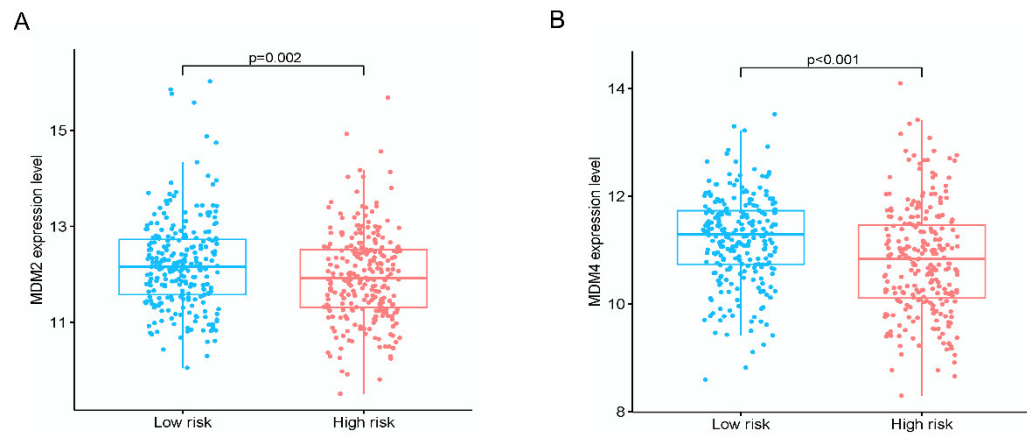

**Figure S5. Biomarkers for hyperprogression in response to ICI treatment.** mRNA levels of (A) MDM2 and (B) MDM4 in low- and high-risk groups.

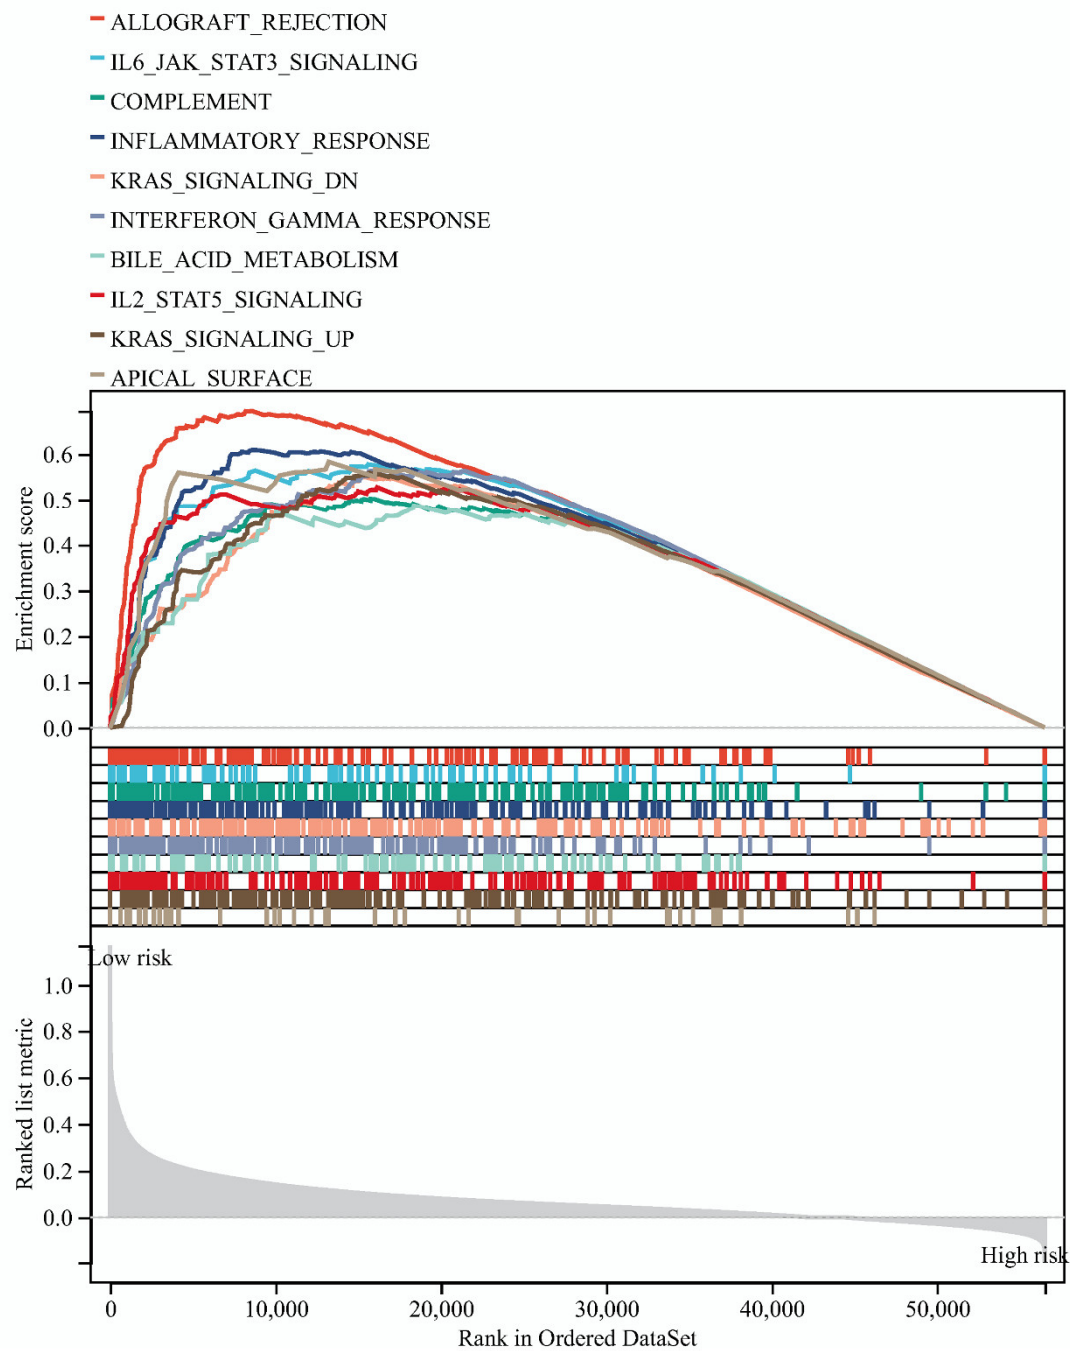

**Figure S6. Top 10 hallmark pathways of GSEA for patients with LUAD and low risk score vs. patients with LUAD and high risk score.**
